# Supplementary material
Source: Springer Nature journal article supplement (https://www.springermedizin.de/resource/supplementary/12943_2014_1447_MOESM2_ESM.pdf/9553030)

**TNM stage**  
(I/II vs III/IV)

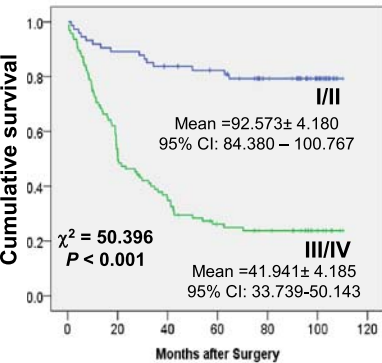

**T category**  
(T1/T2 vs T3/T4)

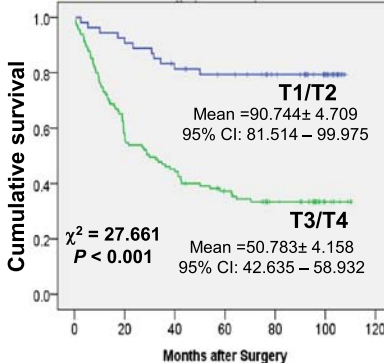

**N category**  
(N0 vs N1-3)

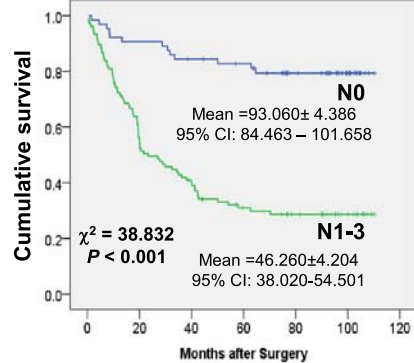

**Tumor size**  
(≤6cm vs >6cm)

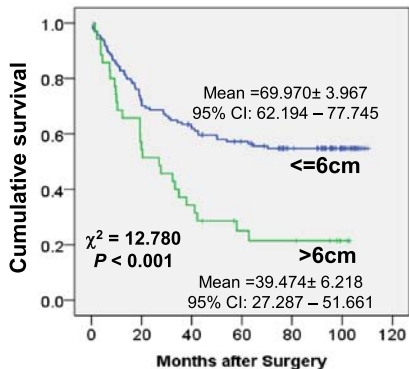

**Differentiation**  
(Well/mod vs Poor/Undiff)

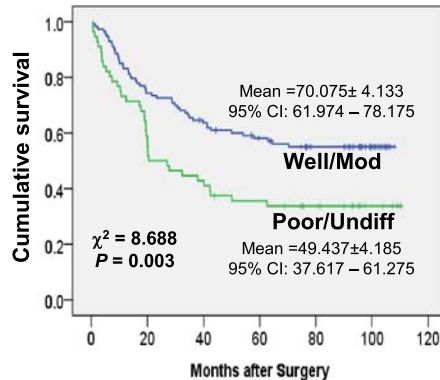

Supplement: MOESM2 [file 9553030]
